# Supplementary material
Source: publisher site journal article supplement (https://www.dovepress.com/article/209937)
Supplement: Supplementary file 1 [file get_supplementary_file.php]

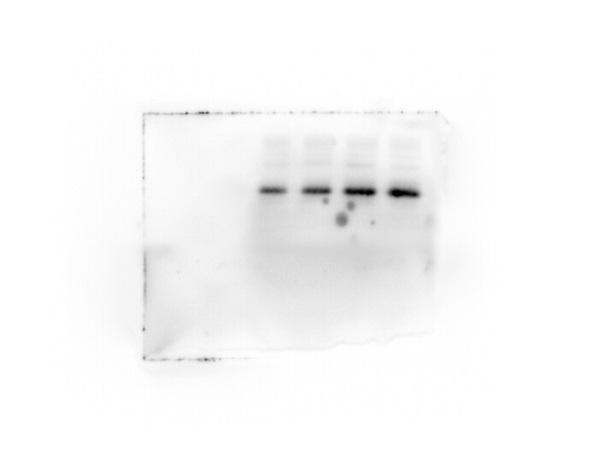


Supplement 1. Western Blot was used to detect the expression of LPL protein. From left to right, it is 0 μM、0.01μM、0.1μM and 1μM Na2SO3 treatment samples respectively.


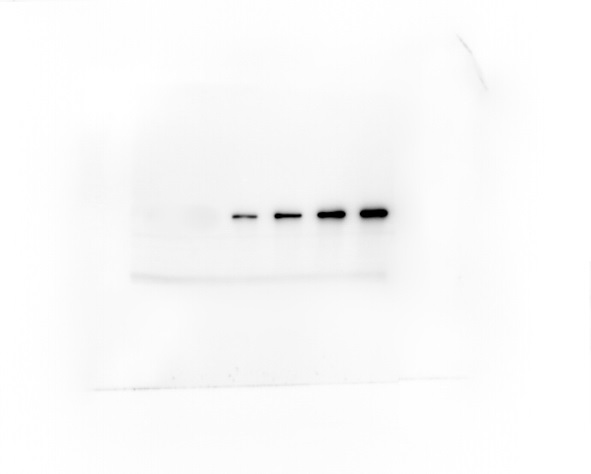


Supplement 2. Western Blot was used to detect the expression of PPARG protein. From left to right, it is 0 μM、0.01μM、0.1μM and 1μM Na2SO3 treatment samples respectively.


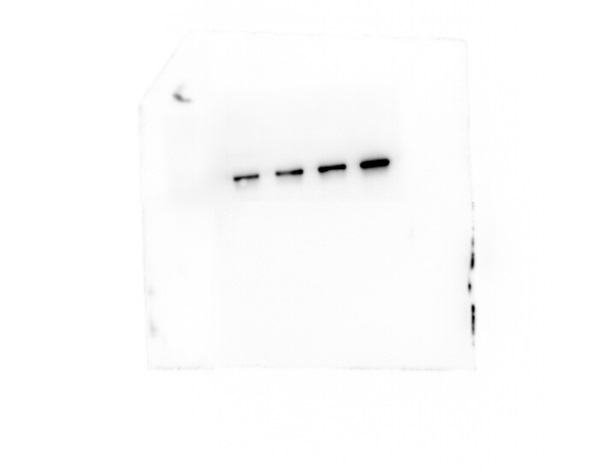


Supplement 3. Western Blot was used to detect the expression of RUNX2 protein. From left to right, it is 0 μM、0.01μM、0.1μM and 1μM Na2SO3 treatment samples respectively.


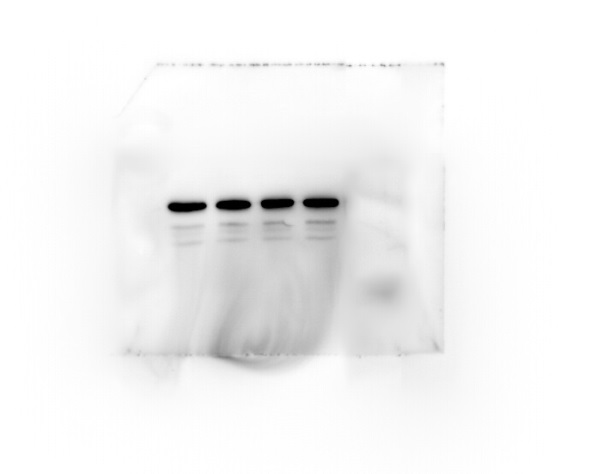


Supplement 4. Western Blot was used to detect the expression of GAPDH protein. From left to right, it is 0 μM、0.01μM、0.1μM and 1μM Na2SO3 treatment samples respectively.
